# Supplementary material for: Anesthesia Workspace Cleanliness and Safety: Implementation of a Novel Syringe Bracket Using 3D Printing Techniques
Source: Anesthesiol Res Pract. 2019 Jul 1;2019:2673781. doi: 10.1155/2019/2673781 (PMC6636519; doi:10.1155/2019/2673781)
Supplement: Supplementary Materials — Supplementary Table 1: Preintervention and postintervention survey questions, extracted from tablet-based survey instrument. Supplementary Table 2: Rationale for iterative changes to bracket design as shown in Figure 2. File: “syringe bracket template.f3d” Description: Original Fusion 360 design file including timeline-based design history. Allows for easy modification of hole size, number, shelf width, and other parameters. File: “syringe bracket adult.stl” Description: Adult version of STL file used for printing. Allows for simple viewing and direct 3D printing without design modification. File: syringe bracket pediatric.stl” Description: Pediatric version of STL file used for printing. Allows for simple viewing and direct 3D printing without design modification. [file 2673781.f1.zip]

Archive with 4 entries (4 files):
- 2673781.f1/mat.2673781.v2.pdf
- 2673781.f1/syringe bracket adult_ARP_2775964.stl
- 2673781.f1/syringe bracket pediatric_ARP_2775965.stl
- 2673781.f1/syringe bracket template_ARP_2775966.f3d
